# Supplementary material for: A unified approach for characterizing static/dynamic connectivity frequency profiles using filter banks
Source: bioRxiv or medRxiv preprint supplement (doi:10.1101/706838), 2020-03-23
Supplement: Supplementary file [file media-1.pdf]

Choosing cluster number:

To choose cluster number we evaluated a range of cluster number (2 through 10). Then we calculated the sum of within cluster distances for all cluster numbers and normalized all the values by the value calculated from using 10 clusters. This number is referred to as the explained variance. We then selected the lowest cluster number with explained variance higher than 0.9 (See Figure S11).

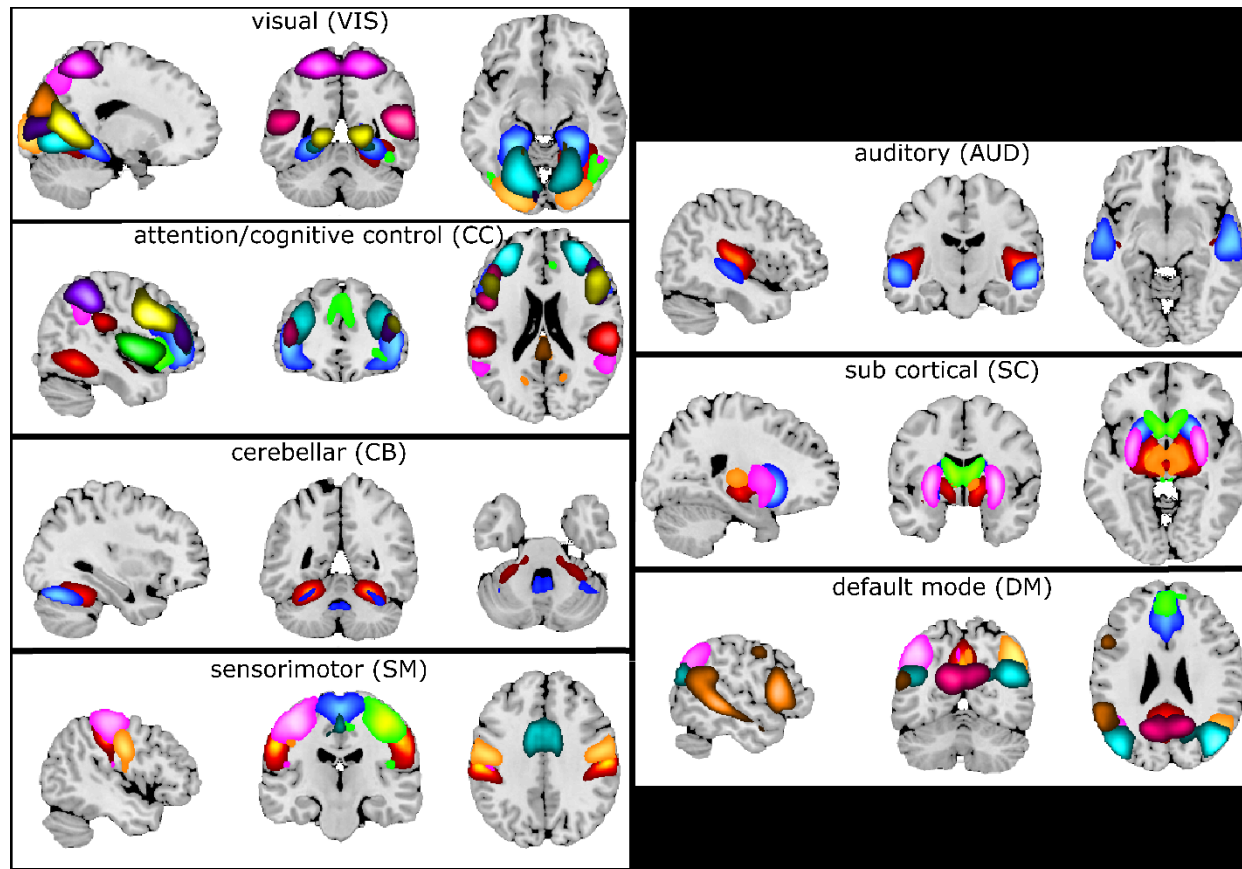

Figure S1. Spatial maps for different functional domains

Window size = 1

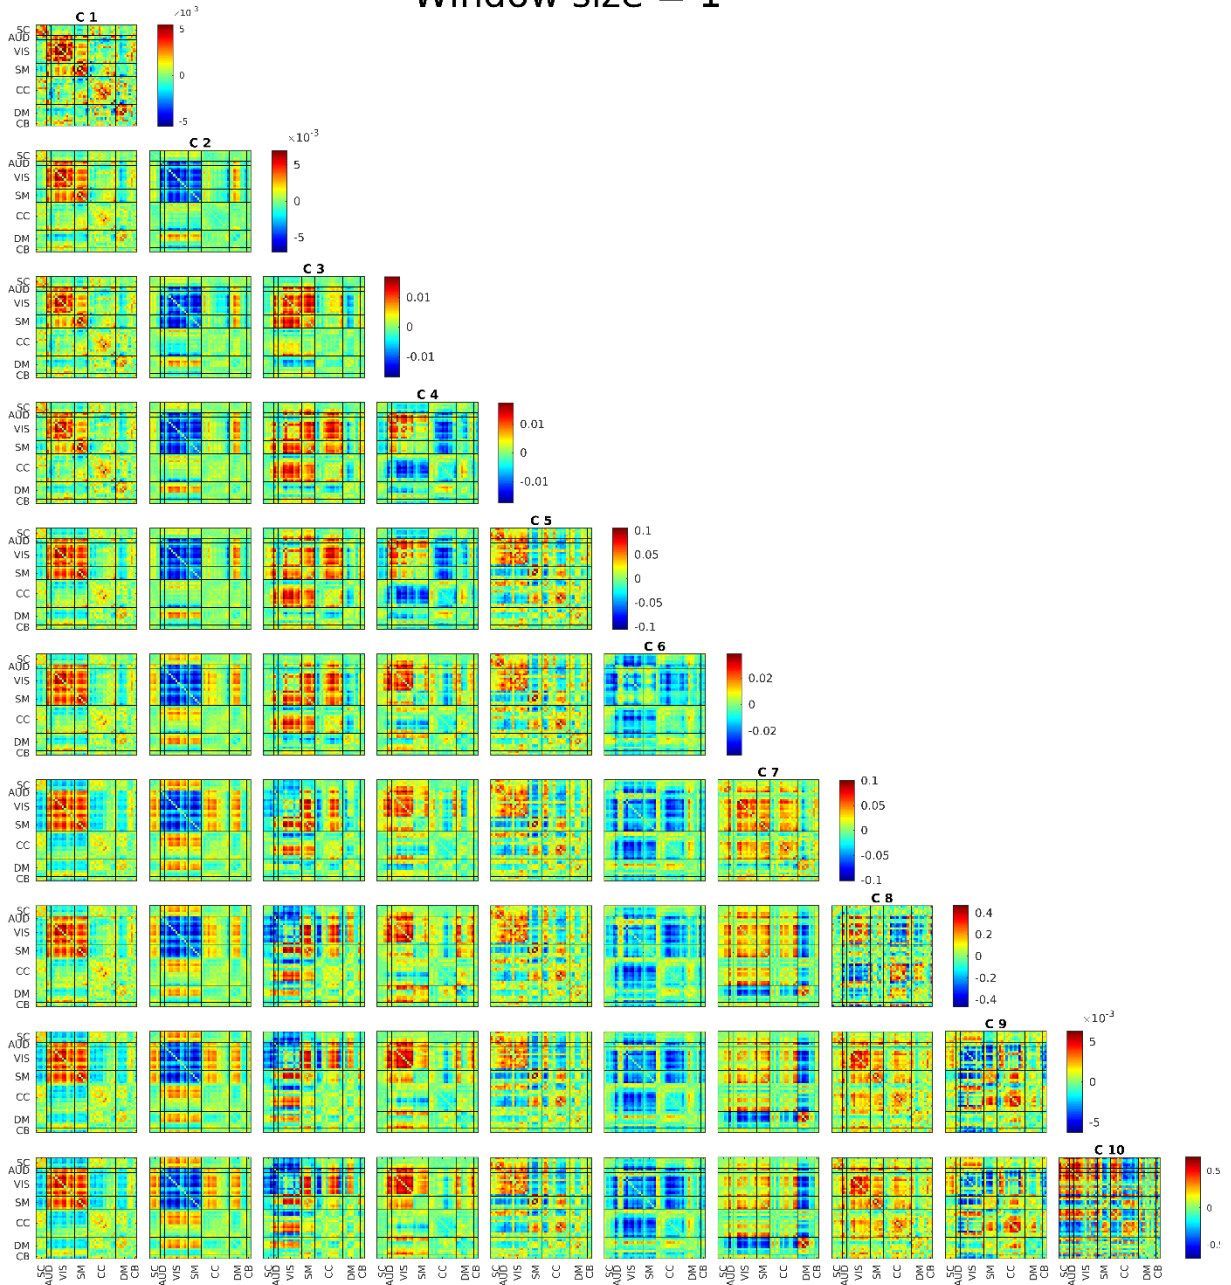

Figure S2. FBC results for window size equal to 1TR (2sec)

Window size = 2

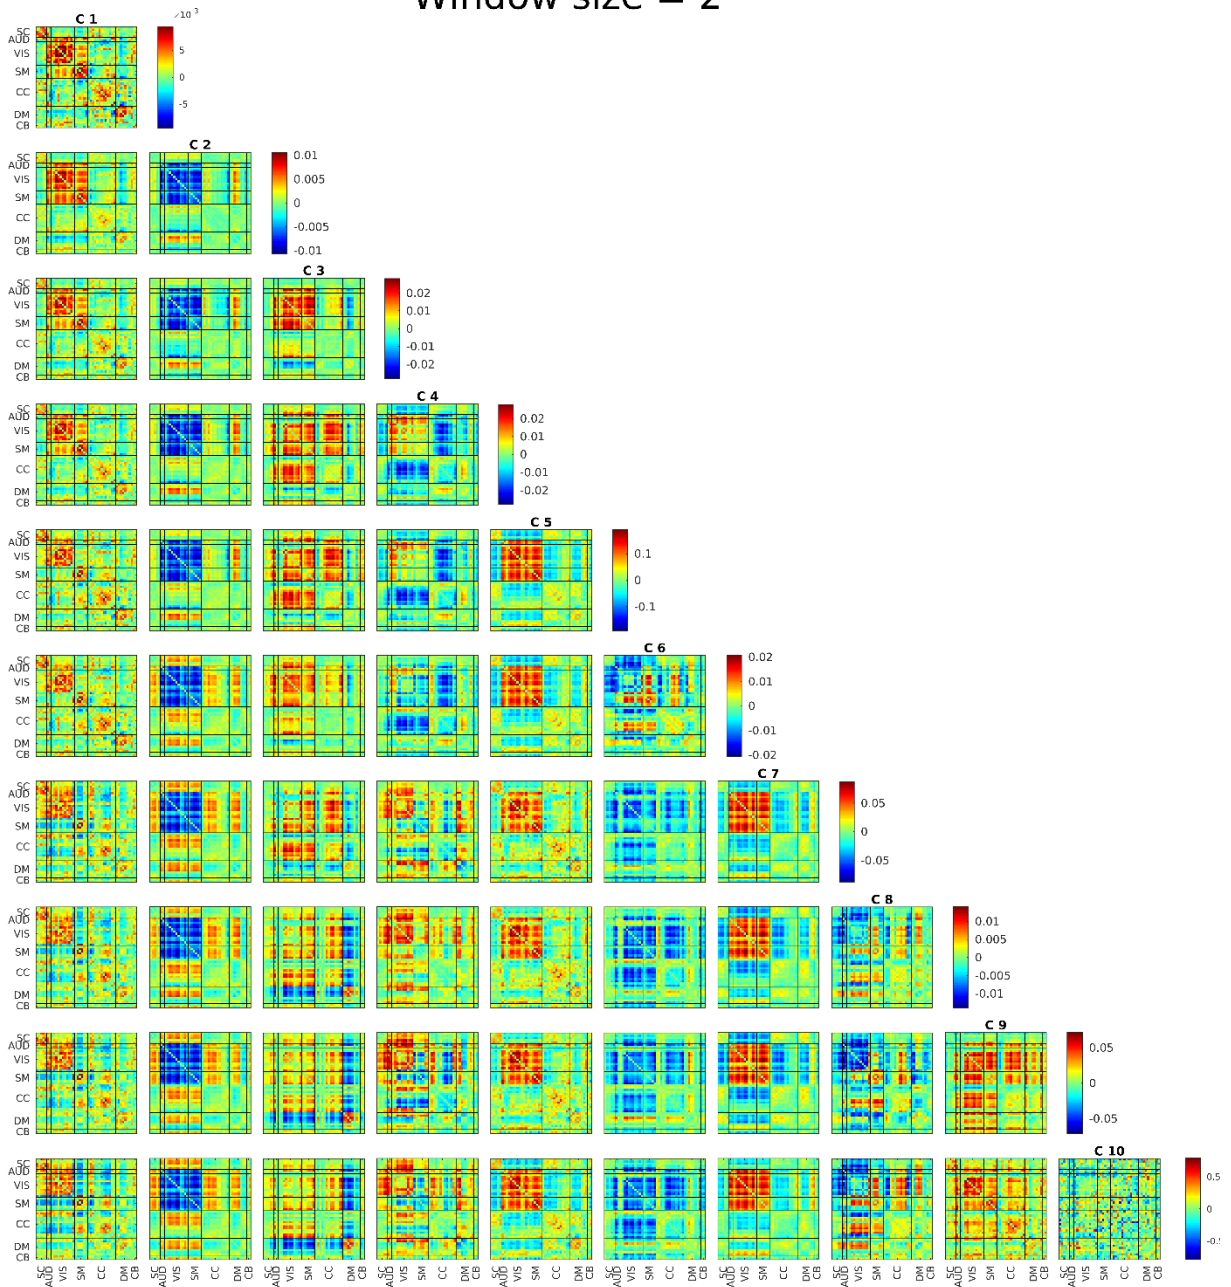

Figure S3 FBC results for window size equal to 2TR (4sec)

Window size = 3

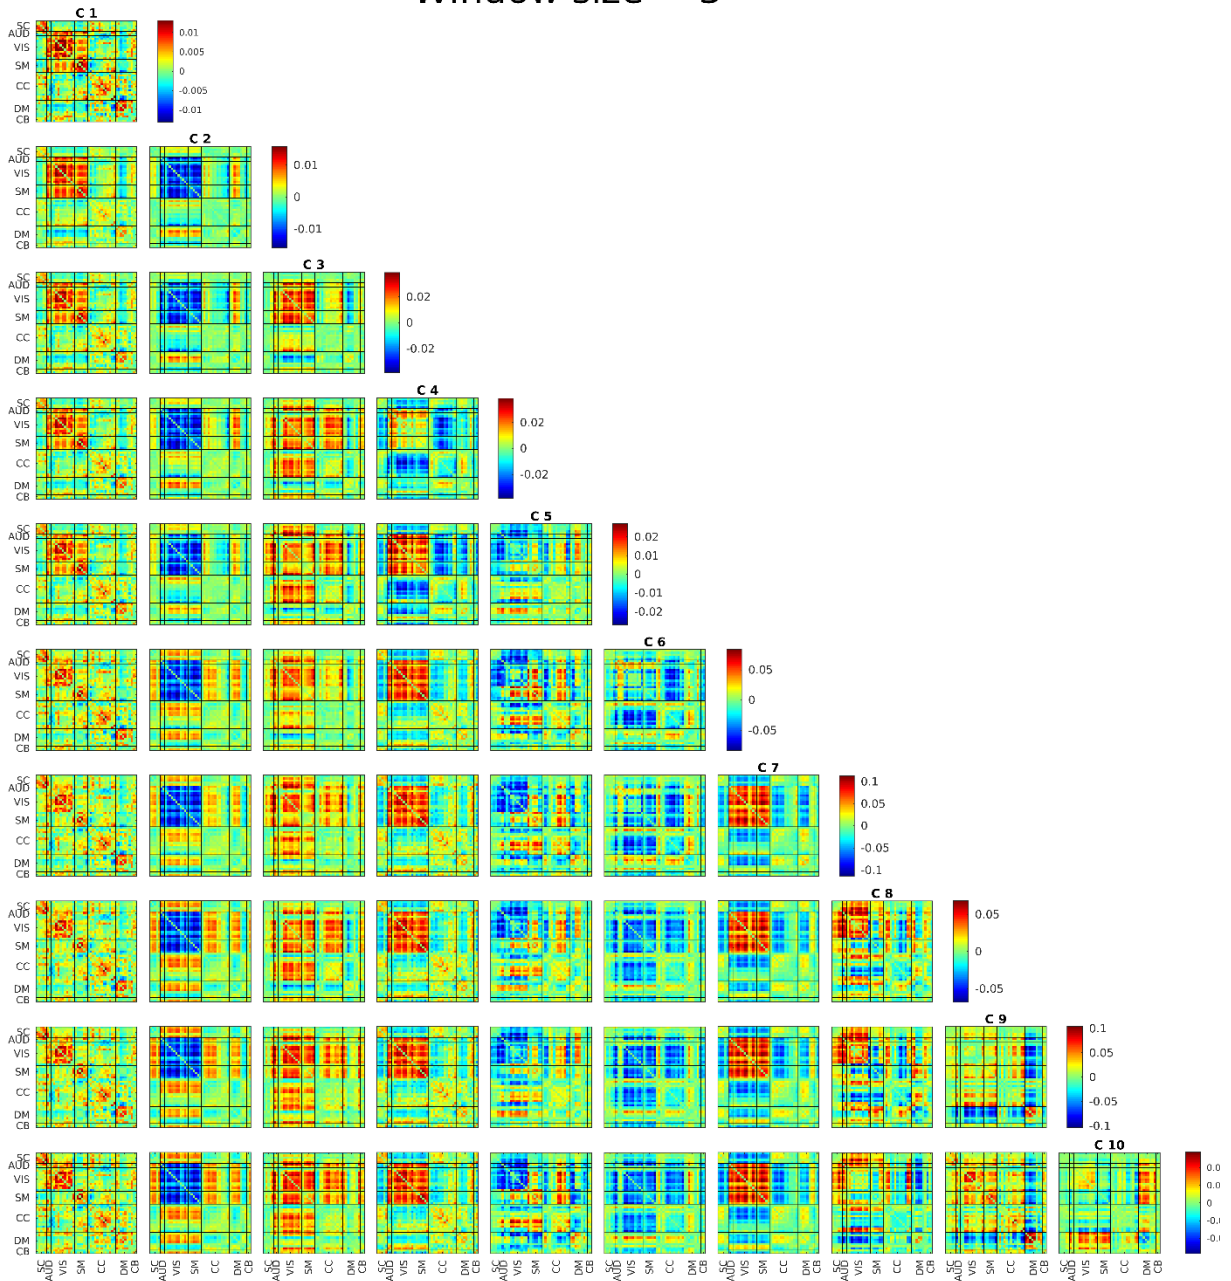

Figure S4 FBC results for window size equal to 3TR (6sec)

Window size = 5

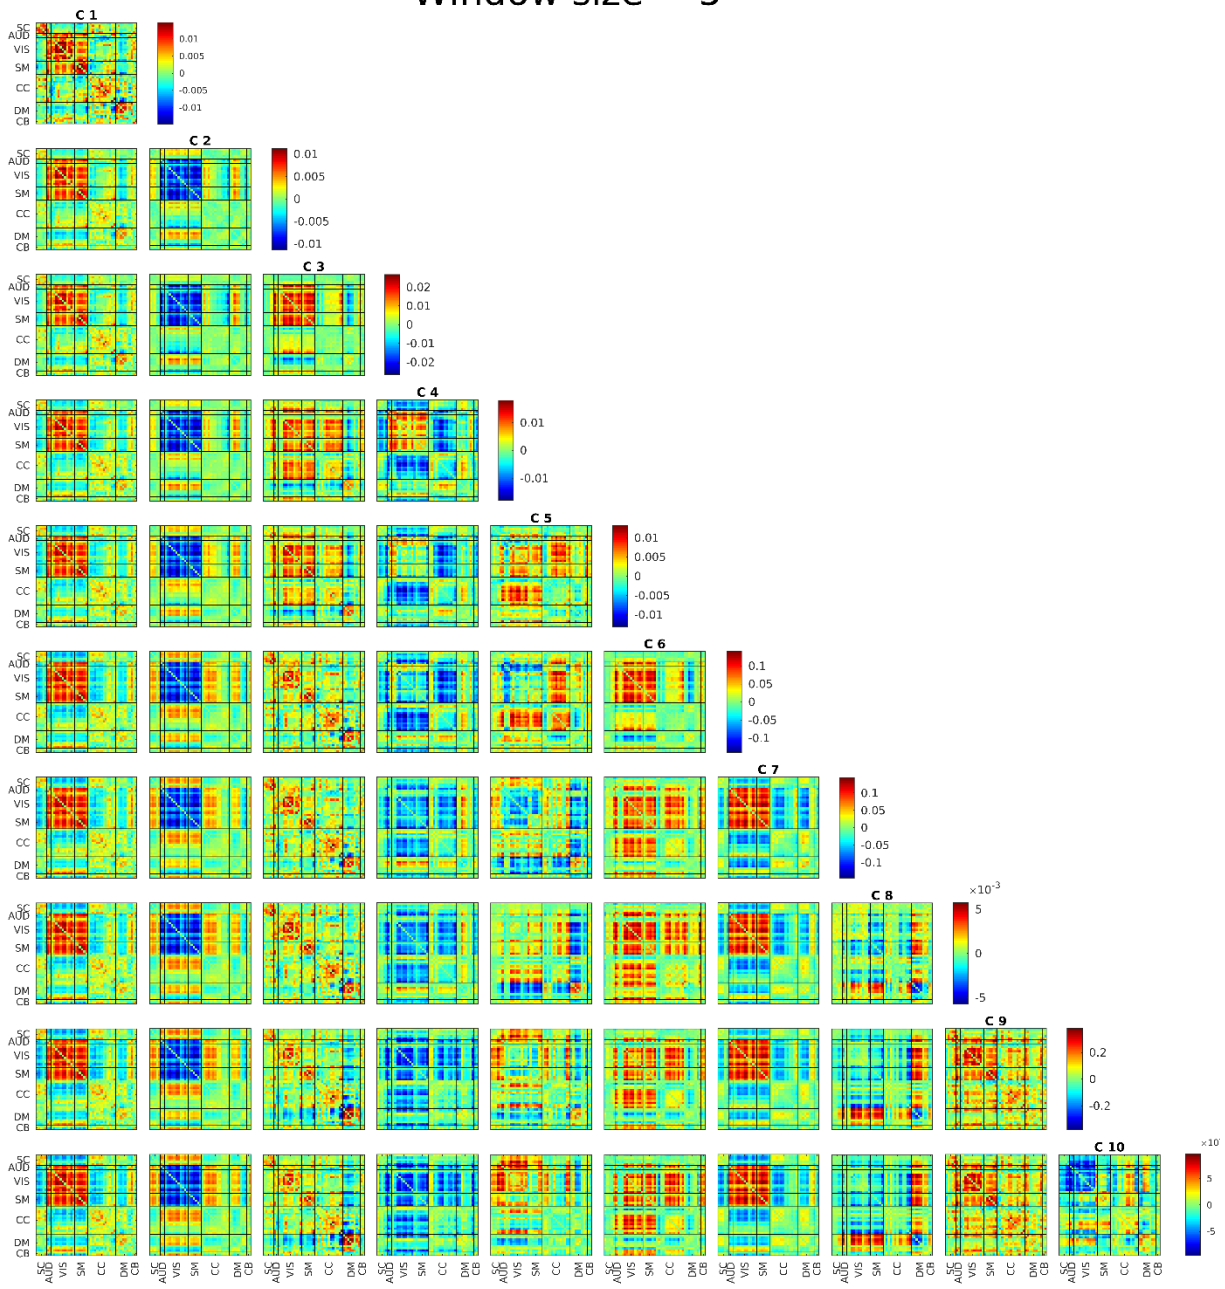

Figure S5 FBC results for window size equal to 5TR (10sec)

Window size = 8

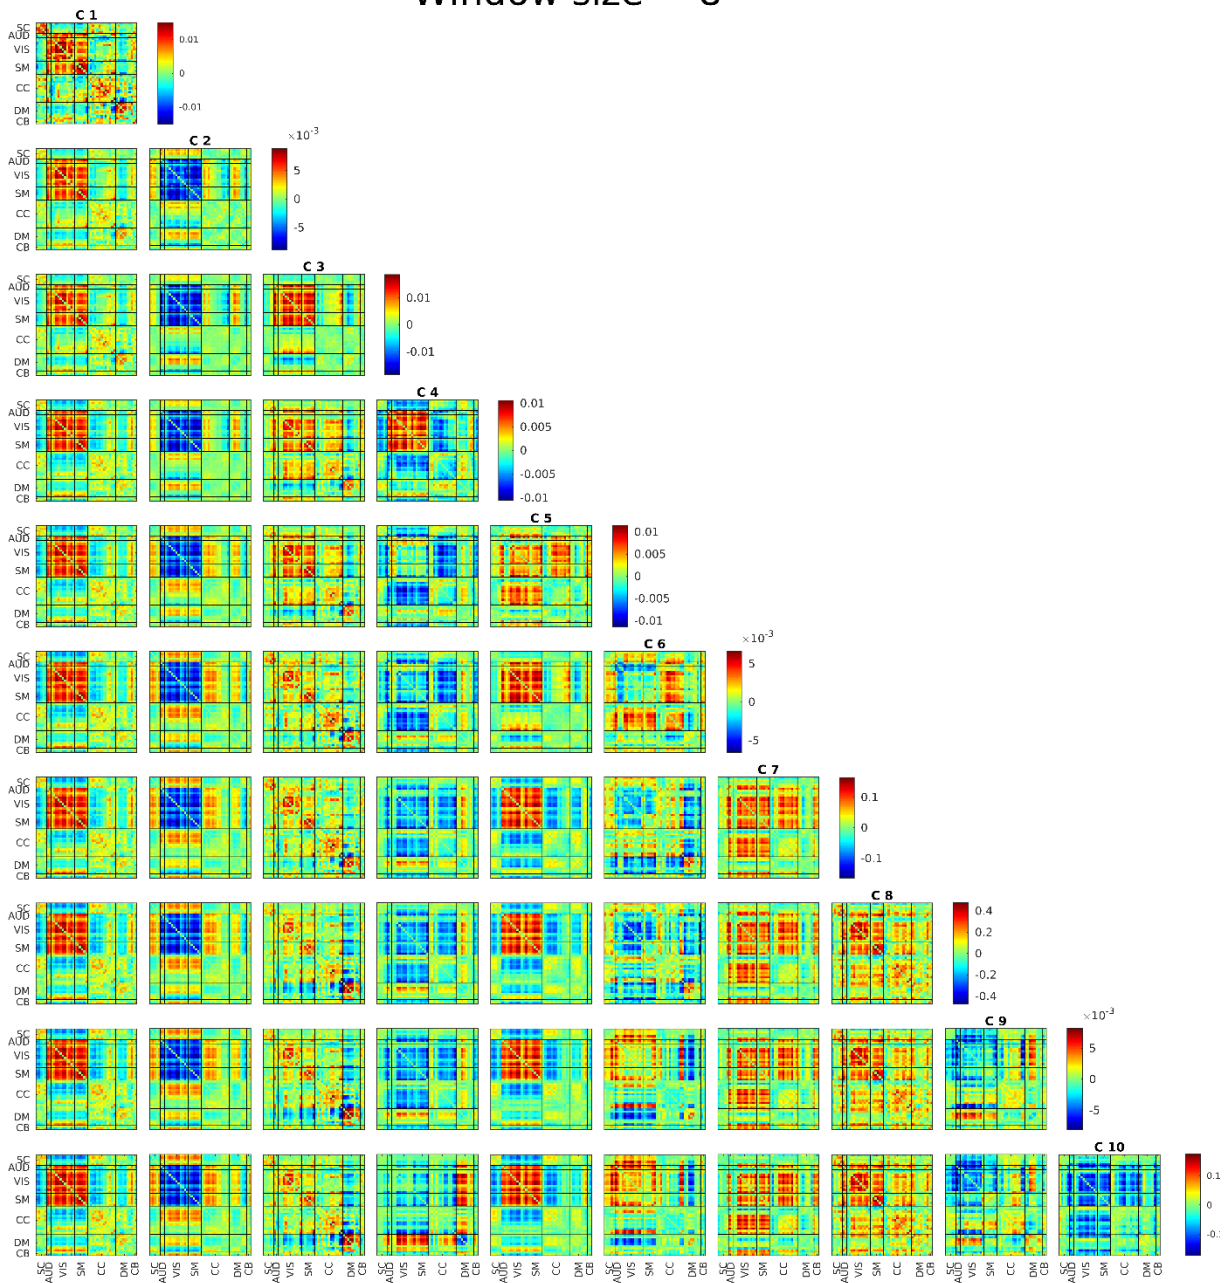

Figure S6 FBC results for window size equal to 8TR (16sec)

Window size = 10

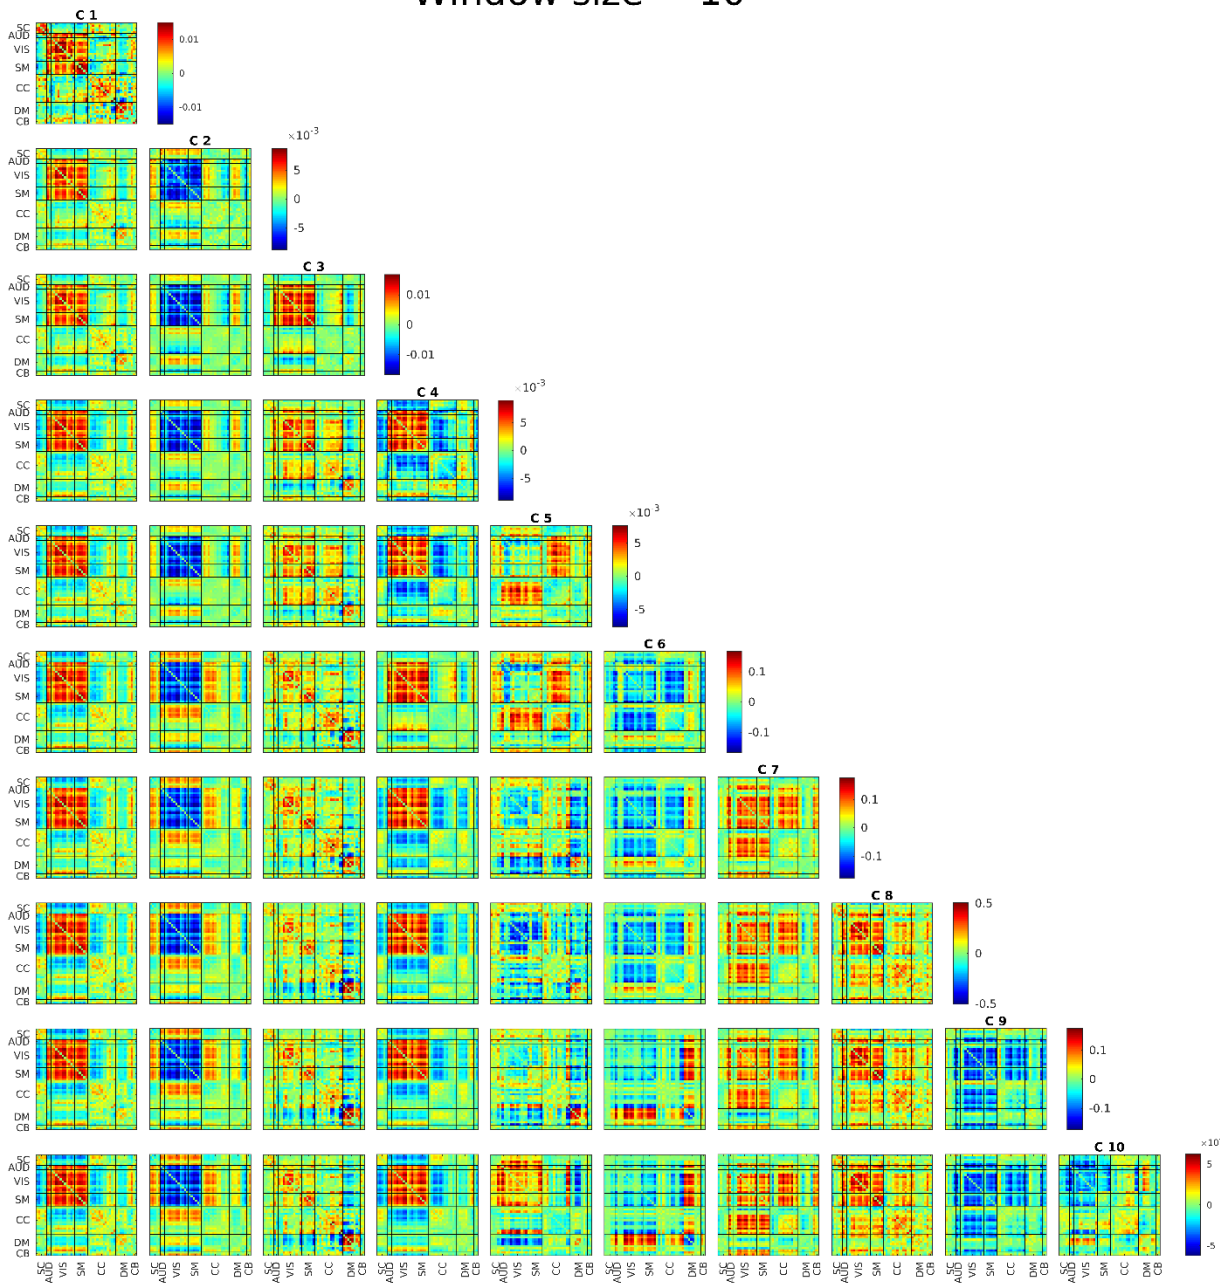

Figure S7 FBC results for window size equal to 10TR (20sec)

Window size = 15

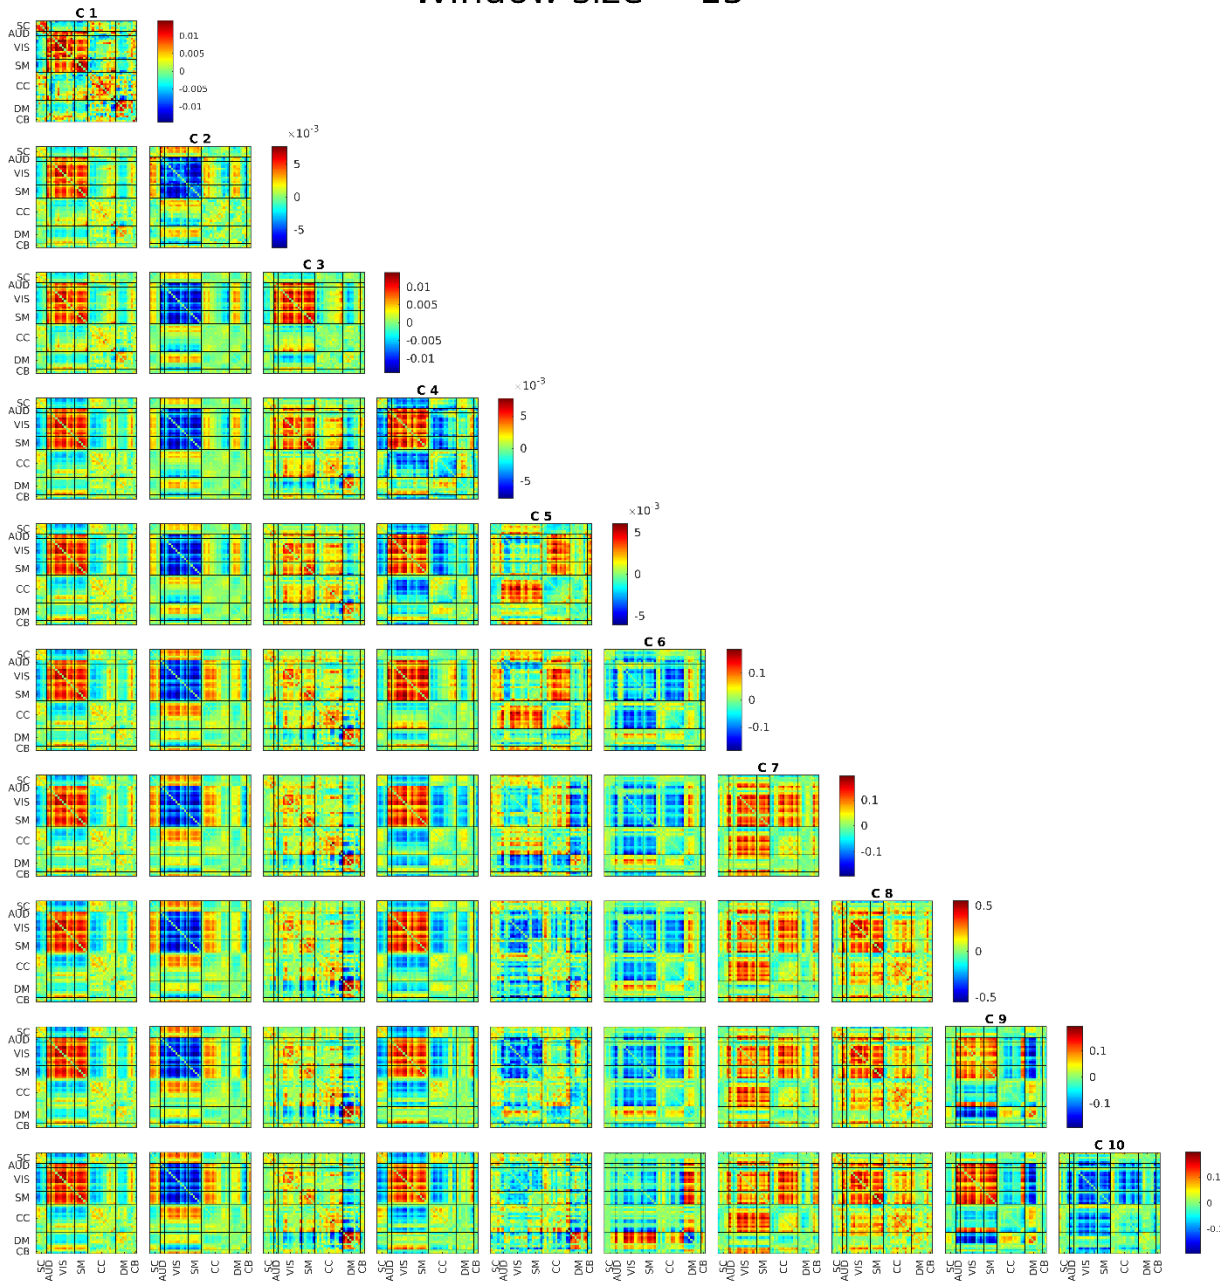

Figure S8 FBC results for window size equal to 15TR (30sec)



Window size = 20

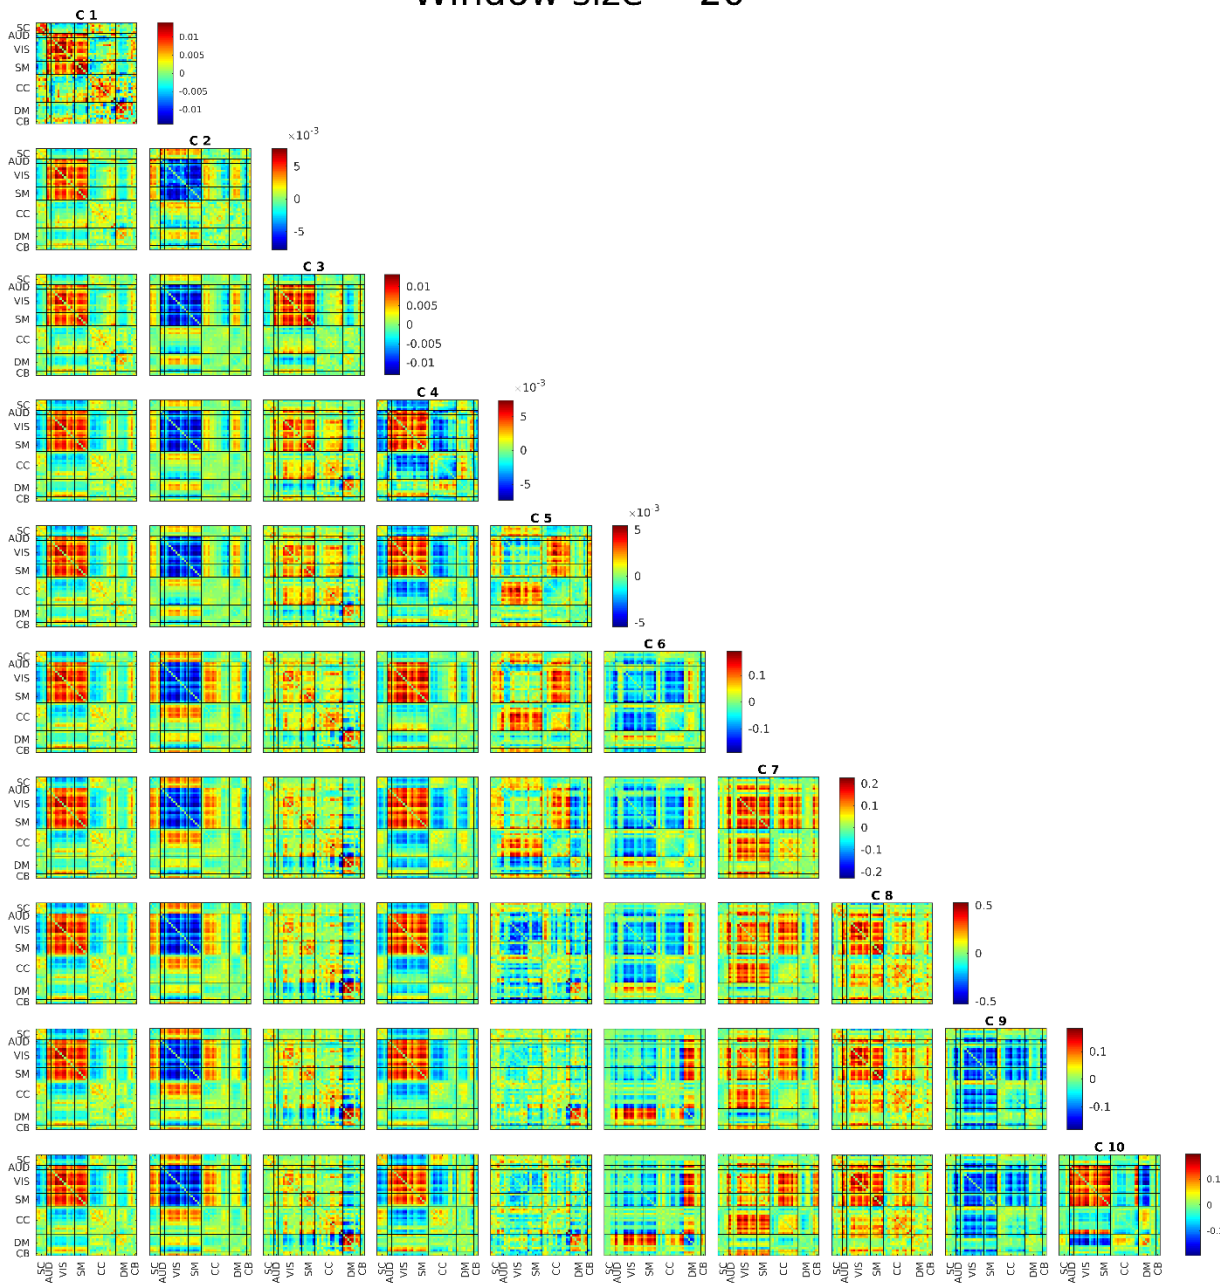

Figure S9 FBC results for window size equal to 20TR (40sec)

Window size = 30

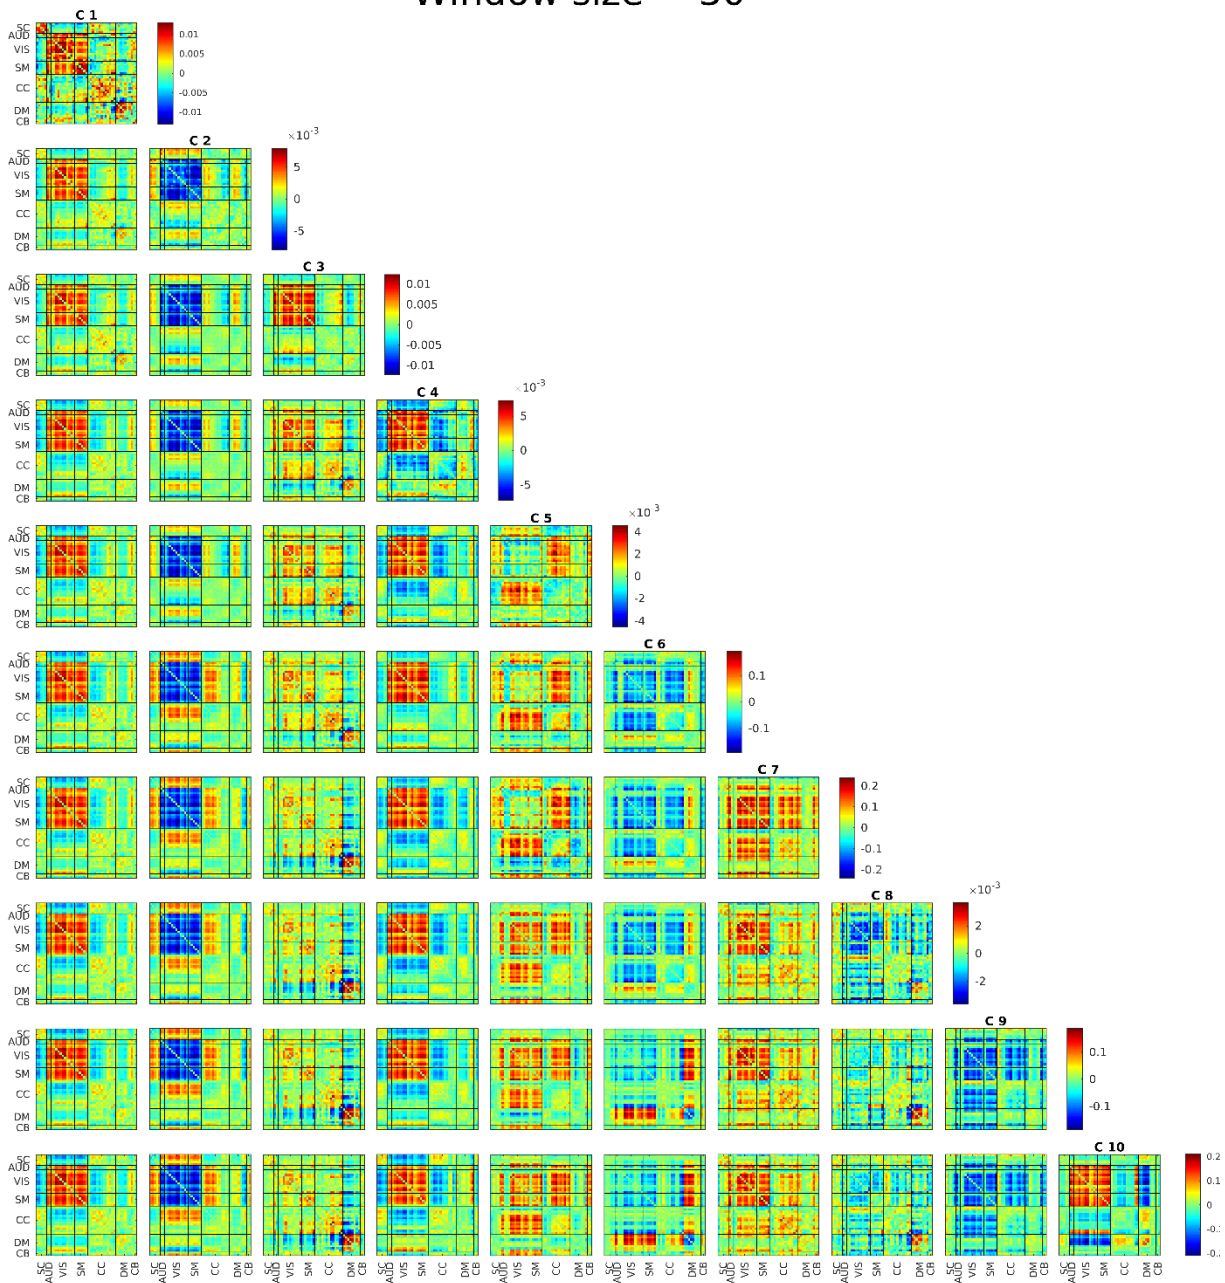

Figure S10 FBC results for window size equal to 30TR (60sec)

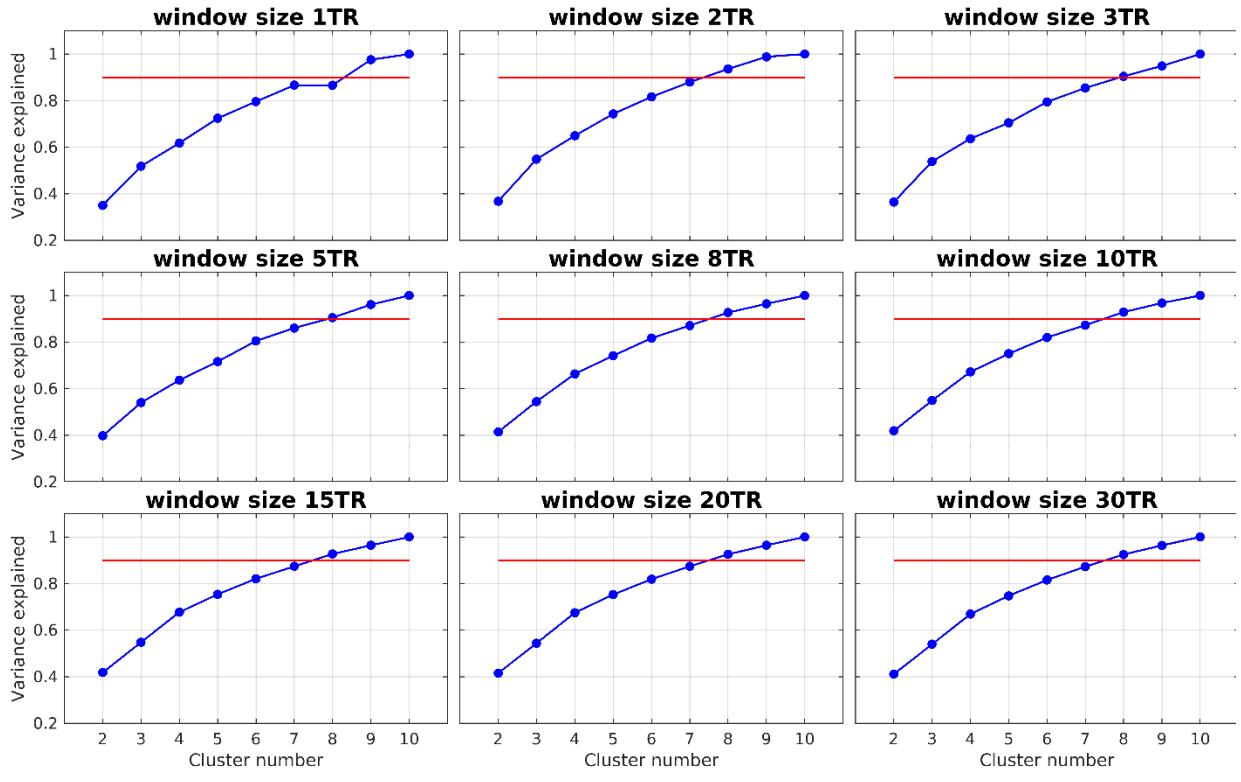

Figure S11 elbow criterion for different window size
